# Supplementary material
Source: PubMed Central journal article supplement (PMC2230603)

## SUPPLEMENTARY FIGURE LEGENDS

**Figure S1.** PFGE analysis of *swi1Δ* cells. Chromosome samples from either wild-type or *swi1Δ* cells were examined by PFGE. Cells were grown until mid-log phase and then incubated in the presence of 12 mM HU for 3 h at 30°C. Cells were then washed and released into fresh medium. Chromosomal DNA samples were prepared at the indicated times. Representative results from repeat experiments are shown.

**Figure S2.** Genetic interaction involving *rqh1Δ*, *ctf18Δ*, *chl1Δ* and *rad21-K1*. (A) Synergistic interaction of *ctf18Δ* and *rqh1Δ* in MMS and CPT survival assays indicates that Ctf18 and Rqh1 function in separate pathways. Fivefold serial dilution of cells were plated on YES agar medium supplemented with the indicated amounts of MMS or CPT for 2 to 3 days at 32°C. Representative images of repeat experiments are shown. (B) Synergistic interaction of *ctf18Δ* or *chl1Δ* and *rad21-K1* in MMS and CPT survival assays suggesting that Ctf18 and Chl1 are involved in sister chromatid cohesion. Fivefold serial dilution of cells were plated on YES agar medium supplemented with the indicated amounts of MMS or CPT for 3 to 5 days at 25°C. Representative results from repeat experiments are shown.

## Supplementary Table S1

### *S. pombe* strains used in this study

| Strains | Genotype*                                                                             | Source             |
|---------|---------------------------------------------------------------------------------------|--------------------|
| Y0001   | <i>h</i> <sup>-</sup>                                                                 | Laboratory stock   |
| Y0002   | <i>h</i> <sup>+</sup>                                                                 | Laboratory stock   |
| Y0149   | <i>h</i> <sup>-</sup> <i>cds1::ura4</i> <sup>+</sup>                                  | Laboratory stock   |
| Y0211   | <i>h</i> <sup>-</sup> <i>swi1::Kan</i> <sup>r</sup>                                   | Laboratory stock   |
| Y0428   | <i>h</i> <sup>-</sup> <i>cds1::Kan</i> <sup>r</sup>                                   | Paul Russell       |
| Y0492   | <i>h</i> <sup>-</sup> <i>chk1::ura4</i> <sup>+</sup>                                  | Laboratory stock   |
| Y0541   | <i>h</i> <sup>-</sup> <i>swi1::Kan</i> <sup>r</sup> <i>ade6-M210</i>                  | Laboratory stock   |
| Y0660   | <i>h</i> <sup>-</sup> <i>lis1-1 swi1::Kan</i> <sup>r</sup> <i>ade6-M210</i>           | This study         |
| Y0668   | <i>h</i> <sup>-</sup> <i>swi3::Kan</i> <sup>r</sup>                                   | Laboratory stock   |
| Y0670   | <i>h</i> <sup>-</sup> <i>rad22-YFP-Kan</i> <sup>r</sup>                               | Laboratory stock   |
| Y0674   | <i>h</i> <sup>-</sup> <i>swi3::Kan</i> <sup>r</sup> <i>rad22-YFP-Kan</i> <sup>r</sup> | Laboratory stock   |
| Y0713   | <i>h</i> <sup>-</sup> <i>lis1-1</i>                                                   | This study         |
| Y0794   | <i>h</i> <sup>-</sup> <i>ctf18::his3</i> <sup>+</sup> <i>his3-D1 ade6-M210</i>        | This study         |
| Y0797   | <i>h</i> <sup>+</sup> <i>swi1::Kan</i> <sup>r</sup> <i>his3-D1</i>                    | Laboratory stock   |
| Y0799   | <i>h</i> <sup>-</sup> <i>swi3::Kan</i> <sup>r</sup> <i>his3-D1</i>                    | Laboratory stock   |
| Y0835   | <i>h</i> <sup>+</sup> <i>cen1-GFP his3-D1</i>                                         | Mitsuhiro Yanagida |
| Y0857   | <i>ctf18::his3</i> <sup>+</sup> <i>rad22-YFP-Kan</i> <sup>r</sup> <i>his3-D1</i>      | This study         |
| Y0863   | <i>h</i> <sup>+</sup> <i>cdc25-22 cen1-GFP his3-D1</i>                                | This study         |
| Y0872   | <i>h</i> <sup>+</sup> <i>swi1::Kan</i> <sup>r</sup> <i>cen1-GFP his3-D1</i>           | This study         |
| Y0874   | <i>h</i> <sup>+</sup> <i>swi3::Kan</i> <sup>r</sup> <i>cen1-GFP his3-D1</i>           | This study         |
| Y0876   | <i>h</i> <sup>+</sup> <i>ctf18::his3</i> <sup>+</sup> <i>cen1-GFP his3-D1</i>         | This study         |
| Y0898   | <i>h</i> <sup>-</sup> <i>rad21-K1-ura4</i> <sup>+</sup> <i>ade6-M216</i>              | Hideo Ikeda        |
| Y0922   | <i>h</i> <sup>+</sup> <i>swi1::Kan</i> <sup>r</sup> <i>cdc25-22 cen1-GFP his3-D1</i>  | This study         |
| Y0924   | <i>h</i> <sup>+</sup> <i>swi3::Kan</i> <sup>r</sup> <i>cdc25-22 cen1-GFP his3-D1</i>  | This study         |

|       |                                                                                       |                  |
|-------|---------------------------------------------------------------------------------------|------------------|
| Y0937 | <i>h<sup>+</sup> rqh1::ura4<sup>+</sup> his3-D1</i>                                   | Laboratory stock |
| Y1001 | <i>chl12::his3<sup>+</sup> rqh1::ura4<sup>+</sup> his3-D1</i>                         | This study       |
| Y1026 | <i>h<sup>+</sup> ctf18::Kan<sup>r</sup> cdc25-22 cen1-GFP his3-D1</i>                 | This study       |
| Y1377 | <i>h<sup>-</sup> rad3::Kan<sup>r</sup> ade6-M216 his3-D1</i>                          | This study       |
| Y1485 | <i>h<sup>-</sup> ctf18-TAP-Kan<sup>r</sup> ade6-M216 his3-D1</i>                      | This study       |
| Y1490 | <i>h<sup>-</sup> ctf18::his3<sup>+</sup> rad3::Kan<sup>r</sup> ade6-M216 his3-D1</i>  | This study       |
| Y1508 | <i>h<sup>+</sup> chl1::Kan<sup>r</sup></i>                                            | This study       |
| Y1510 | <i>h<sup>+</sup> chl1::Kan<sup>r</sup> his3-D1</i>                                    | This study       |
| Y1511 | <i>h<sup>-</sup> ctf18::his3<sup>+</sup> cds1::ura4<sup>+</sup> ade6-M216 his3-D1</i> | This study       |
| Y1513 | <i>h<sup>-</sup> ctf18::his3<sup>+</sup> chk1::ura4<sup>+</sup> ade6-M216 his3-D1</i> | This study       |
| Y1515 | <i>h<sup>-</sup> ctf18-5FLAG-Kan<sup>r</sup></i>                                      | This study       |
| Y1550 | <i>h<sup>-</sup> chk1::Kan<sup>r</sup></i>                                            | This study       |
| Y1567 | <i>h<sup>-</sup> rad3::Kan<sup>r</sup></i>                                            | This study       |
| Y1571 | <i>h<sup>-</sup> chl1::hph</i>                                                        | This study       |
| Y1580 | <i>h<sup>-</sup> ctf18-5FLAG-Kan<sup>r</sup> cdc25-22</i>                             | This study       |
| Y1591 | <i>chl1::hph cds1::Kan<sup>r</sup></i>                                                | This study       |
| Y1593 | <i>chl1::hph chk1::Kan<sup>r</sup></i>                                                | This study       |
| Y1595 | <i>chl1::hph rad3::Kan<sup>r</sup></i>                                                | This study       |
| Y1597 | <i>h<sup>-</sup> rad17-TAP-Kan<sup>r</sup> his3-D1</i>                                | Paul Russell     |
| Y1598 | <i>h<sup>-</sup> rfc4-13myc-Kan<sup>r</sup></i>                                       | Paul Russell     |
| Y1599 | <i>h<sup>-</sup> rfc5-13myc-Kan<sup>r</sup></i>                                       | Paul Russell     |
| Y1600 | <i>h<sup>+</sup> ctf18-TAP-Kan<sup>r</sup> rfc4-13myc-Kan<sup>r</sup> his3-D1</i>     | This study       |
| Y1601 | <i>h<sup>-</sup> ctf18-TAP-Kan<sup>r</sup> rfc5-13myc-Kan<sup>r</sup> his3-D1</i>     | This study       |
| Y1602 | <i>h<sup>+</sup> rad17-TAP-Kan<sup>r</sup> rfc4-13myc-Kan<sup>r</sup></i>             | Paul Russell     |
| Y1603 | <i>h<sup>+</sup> rad17-TAP-Kan<sup>r</sup> rfc5-13myc-Kan<sup>r</sup></i>             | Paul Russell     |
| Y1795 | <i>h<sup>+</sup> nda3-KM311 cen1-GFP his3-D1</i>                                      | This study       |
| Y1797 | <i>h<sup>+</sup> swi1::Kan<sup>r</sup> nda3-KM311 cen1-GFP his3-D1</i>                | This study       |

|       |                                                                                 |            |
|-------|---------------------------------------------------------------------------------|------------|
| Y1800 | <i>h<sup>+</sup> swi3::Kan<sup>r</sup> nda3-KM311 cen1-GFP his3-D1</i>          | This study |
| Y1913 | <i>h<sup>-</sup> ctf18::Kan<sup>r</sup></i>                                     | This study |
| Y1978 | <i>h<sup>+</sup> chl1::Kan<sup>r</sup> cen1-GFP his3-D1</i>                     | This study |
| Y2233 | <i>h<sup>+</sup> chl1::Kan<sup>r</sup> cdc25-22 cen1-GFP his3-D1</i>            | This study |
| Y2237 | <i>h<sup>+</sup> rad21-K1:ura4<sup>+</sup> cdc25-22 cen1-GFP his3-D1</i>        | This study |
| Y2241 | <i>h<sup>+</sup> chl1::Kan<sup>r</sup> nda3-KM311 cen1-GFP his3-D1</i>          | This study |
| Y2243 | <i>h<sup>+</sup> ctf18::Kan<sup>r</sup> nda3-KM311 cen1-GFP his3-D1</i>         | This study |
| Y2273 | <i>h<sup>+</sup> rad21-K1:ura4<sup>+</sup> ctf18::Kan<sup>r</sup> ade6-M216</i> | This study |
| Y2274 | <i>h<sup>+</sup> rad21-K1:ura4<sup>+</sup> ctf18::Kan<sup>r</sup> ade6-M216</i> | This study |
| Y2276 | <i>h<sup>+</sup> rad21-K1:ura4<sup>+</sup> chl1::Kan<sup>r</sup> ade6-M216</i>  | This study |
| Y2277 | <i>h<sup>+</sup> rad21-K1:ura4<sup>+</sup> chl1::Kan<sup>r</sup> ade6-M216</i>  | This study |

---

\* All strains are also *leu1-32* and *ura4-D18*

\* The actual genotype of *cen1-GFP* is *lys1<sup>+</sup>:lacOrepeat his7<sup>+</sup>:disIpromoter-GFP-LacI-NLS*

## Supplementary Table S2

### DNA oligonucleotide primers used in this study

| Primer | Sequence (5' to 3')                                                                                                                         |
|--------|---------------------------------------------------------------------------------------------------------------------------------------------|
| P525   | GTT TGA CGG ATG GAG TTT ATG                                                                                                                 |
| P526   | GGG GAT CCG TCG ACC TGC AGC GTA CGT TTA AAG GTA AAA<br>CAA CCT TTT CAG AAA CCT G                                                            |
| P529   | GTT TAA ACG AGC TCG AAT TCT AGA CAT ATG GTT TGC GTT<br>ACA GCG TC                                                                           |
| P530   | CAG CTC GAT GGA CTG AAT TAA GC                                                                                                              |
| P532   | ATG CAA TCA ATA TCA AAT TTC ACG ATG GGT TTT CCA ATG<br>CTG TGA GAA AAC CAA TAT CGT TGA ACG AGA TTC TGA ATT<br>TCC GGA TCC CCG GGT TAA TTA A |
| P533   | TAA TGG TTA GAT GAA TTT ACG CAT ACA CCT ATT TTT ACT<br>AGT GAT TTT TTT TTA AAT TAA ATG ATT GAT TTT ATT TCG<br>GCG GCG TTA GTA TCG AAT CGA C |
| P534   | CTC AAG TTG TTA CTG TAG TTT C                                                                                                               |
| P535   | TTA ATT AAC CCG GGG ATC CGT CTT TGG TGT AAA GGG AAA<br>GAA GAT TAT AAT ATA AC                                                               |
| P538   | GTT TAA ACG AGC TCG AAT TCT AAT TGC ACA TCT TTT GAA<br>AGG TCG TG                                                                           |
| P539   | CAA ATG AGC CGT CAG ATA TCT C                                                                                                               |
| P545   | CTC CGC ACA CGG TAT GAG TTT CAT                                                                                                             |
| P547   | GTT TAA ACG AGC TCG AAT TCT AAT CTA ATG TGC ATT AAT<br>ATT TTT AAT TTC AAT C                                                                |
| P548   | CAA TTG TGT AAG GGA CAG AAG G                                                                                                               |
| P574   | GGG GAT CCG TCG ACC TGC AGC GTA CGA TGA GTT GGA AAT<br>CCA AAT TTT CAA ATG GAA C                                                            |

CTF18-KO1      ATT GTT ACA TGT TCC ATT TGA AAA TTT GGA TTT CCA ACT  
CAT ATG GAT TCG ATT CCA AAT GAG GAT GAT TTG GAG TTT  
CAA CGT TTT CTT TAC TAT TGC A

CTF18-KO2      CAC ATT AGA TTA GAA ATT CAG AAT CTC GTT CAA CGA TAT  
TGG TTT TCT CAC AGC ATT GGA AAA CCC ATC GTG CTA TGC  
AAA GCT AAC GAA TCT TTA ATT C

URAKAN-T1      CCC ACT GGC TAT ATG TAT GCA TTT GTG TTA AAA AAG TTT  
GTA TAG ATT ATT TAA TCT ACT CAG CAT TCT TTC TCT AAC  
GCG CCA GAT CTG TTT AGC TTG C

URAKAN-B1      GAT ATT GAC GAA ACT TTT TGA CAT CTA ATT TAT TCT GTT  
CCA ACA CCA ATG TTT ATA ACC AAG TTT TAT CTT GTT TGG  
GCG GCG TTA GTA TCG AAT CGA C

---

**Figure S1**

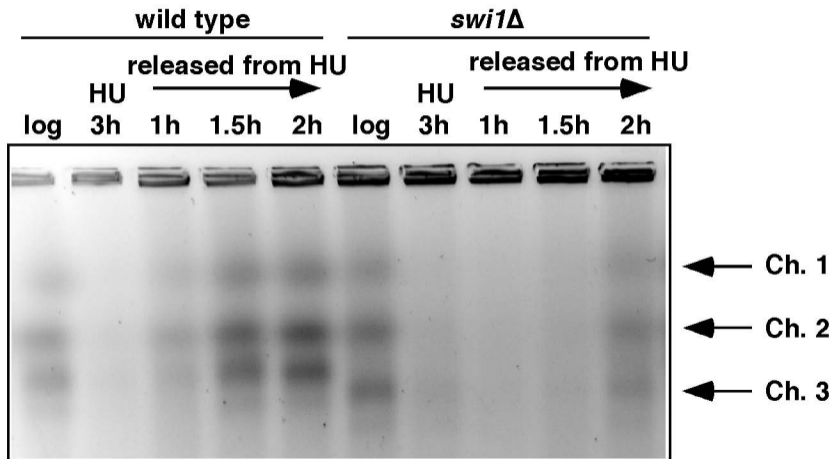

**Figure S2**

**A**

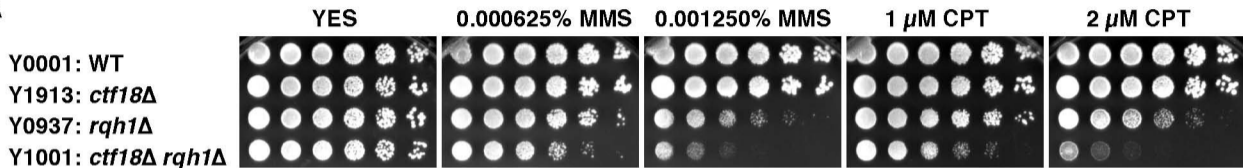

**B**

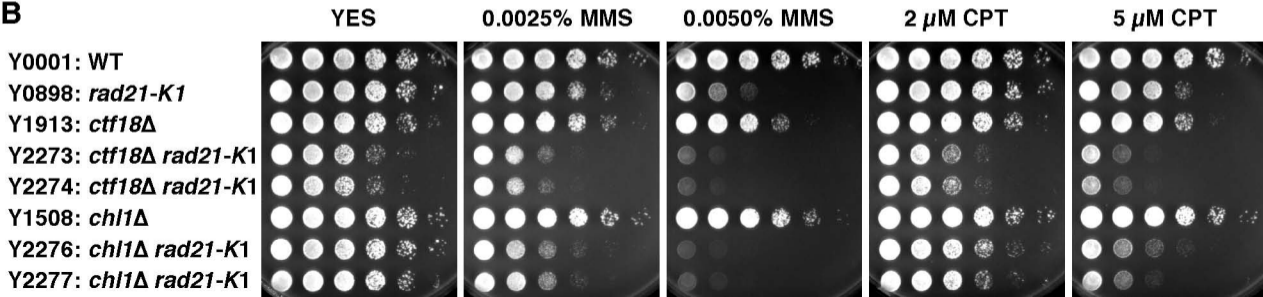

Supplement: mbc_E07-06-0618_1.pdf [file mbc_E07-06-0618_1.pdf]
